# Supplementary material
Source: bioRxiv or medRxiv preprint supplement (https://www.biorxiv.org/highwire/filestream/53772/field_highwire_adjunct_files/0/172676-1.pdf)
Supplement: Supplementary file [file 172676-1.pdf]

**Table S1. Oligonucleotides used in this study.**

| <b>sgRNA cloning</b> |                                   |                    |
|----------------------|-----------------------------------|--------------------|
| LAPAU2501            | <b>ATTG</b> ATGAGGAGATATTATCTG    | VQ33-42            |
| LAPAU2502            | <b>AAAC</b> CAGATAATATCTCCTCAT    | VQ33-42            |
| LAPAU2503            | <b>ATTG</b> CCTTAACGTATTGATCATT   | VQ33-38            |
| LAPAU2504            | <b>AAAC</b> AATGATCAATACGTTAAGG   | VQ33-38            |
| LAPAU2505            | <b>ATTG</b> GGTCATCGTTGCTTCTCAG   | VQ33-1             |
| LAPAU2506            | <b>AAAC</b> CTGAGAAGCAACGATGACC   | VQ33-1             |
| LAPAU2507            | <b>ATTG</b> CGGAGAGTCTGGAGATCTT   | VQ19-34            |
| LAPAU2508            | <b>AAAC</b> AAGATCTCCAGACTCTCCG   | VQ19-34            |
| LAPAU2509            | <b>ATTG</b> GGACTGTTAAGTGCAAGCT   | VQ19-6             |
| LAPAU2510            | <b>AAAC</b> AGCTTGCACTTAACAGTCC   | VQ19-6             |
| LAPAU2648            | <b>ATTG</b> ATAAGGCATCGGTGTTAAG   | GLB3-3             |
| LAPAU2649            | <b>AAAC</b> CTTAACACCGATGCCTTAT   | GLB3-3             |
| LAPAU2650            | <b>ATTG</b> ACCTTCGAGCCGAGCTCGG   | GRXS17-4           |
| LAPAU2651            | <b>AAAC</b> CCGAGCTCGGCTCGAAGGT   | GRXS17-4           |
| LAPAU2819            | <b>ATTG</b> ACTTCCCAAAATGACTCCAG  | WRKY20-201         |
| LAPAU2820            | <b>AAAC</b> CTGGAGTCATTTTGGGAAGT  | WRKY20-201         |
| LAPAU2821            | <b>ATTG</b> TATGGCTGCACAAGAAGAA   | WRKY20-39          |
| LAPAU2822            | <b>AAAC</b> TTCTTCTTGTGCAGCCATA   | WRKY20-39          |
| LAPAU2830            | <b>ATTG</b> GAGATTTGGTTCTCTGTTG   | JAM2-109           |
| LAPAU2831            | <b>AAAC</b> CAACAGAGAACCAAATCTC   | JAM2-109           |
| LAPAU2834            | <b>ATTG</b> TATTGCAGAGAGCCTAAAGA  | JAM2-140           |
| LAPAU2835            | <b>AAAC</b> TCTTTAGGCTCTCTGCAATA  | JAM2-140           |
| LAPAU3059            | <b>ATTG</b> CCTTGATAAATTGCGCCAGAG | GRXS17-133         |
| LAPAU3060            | <b>AAAC</b> CTCTGGCGCAAGTTATCAAG  | GRXS17-133         |
| LAPAU3061            | <b>ATTG</b> ATTATGGAGCTAAGTGAGAG  | GRXS17-67          |
| LAPAU3062            | <b>AAAC</b> CTCTCACTTAGCTCCATAAT  | GRXS17-67          |
| <b>TIDE</b>          |                                   |                    |
| LAPAU2759            | GTCGTCGCACGACAAAATA               | VQ33-42            |
| LAPAU2760            | TCATCGTTGCTTCTCAGTGG              | VQ33-42            |
| LAPAU2761            | CCTCATCATCATGACCAGCA              | VQ33-38            |
| LAPAU2762            | GCTAAACAAAATCCGGAGATAGA           | VQ33-38            |
| LAPAU2763            | CAACAACAACATGTTTCGCTAAG           | VQ33-1             |
| LAPAU2764            | ATTGAGTGGCACACGTTGAA              | VQ33-1             |
| LAPAU2765            | TTTTCCAAACTATTAGAGGAAACCA         | VQ19-34 and VQ19-6 |
| LAPAU2766            | TTTTCCAAACTATTAGAGGAAACCA         | VQ19-34 and VQ19-6 |
| LAPAU2789            | CAGCTGTACTGCAACGGAGA              | GRXS17-4           |
| LAPAU2790            | GGAAAAGTTGGCCAGTTTGA              | GRXS17-4           |
| LAPAU2791            | ATATGCCAAAAAGGCCCAAC              | GLB3-3             |
| LAPAU2792            | TTGAAACCATTCTTCTTCGTCA            | GLB3-3             |
| LAPAU3063            | TGGAACGAGGACGATAAAGC              | JAM2-109           |
| LAPAU3064            | AGCTCTAACCGGAGGCAAAC              | JAM2-109           |
| LAPAU3065            | AAGCGATTGTTGCGTCATTA              | JAM2-140           |
| LAPAU3066            | GCAAATCCTTGCCGAATATC              | JAM2-140           |
| <b>Cas9</b>          |                                   |                    |
| LAPAU3076            | TCCCTCATCAGATCCACCTC              | Cas9 genotyping    |
| LAPAU3077            | CTGAAACCTGAGCCTTCTGG              | Cas9 genotyping    |
| <b>qPCR</b>          |                                   |                    |
| LAPAU1470            | AGATATCTGAGGCTTACTCTGTTGC         | GRXS17 Exon 2      |
| LAPAU1471            | TACCATCCTTGAAGAAGACGAAA           | GRXS17 Exon 2      |
| LAPAU1472            | CGCCAAGGCCTTAAAGTGTA              | GRXS17 Exon 3      |
| LAPAU1473            | CATAAGCTCGCCTTTCACG               | GRXS17 Exon 3      |

Overhangs for type IIS cloning are indicated in bold.
